# Supplementary material for: Comparative Assessment of Filtration- and Precipitation-Based Methods for the Concentration of SARS-CoV-2 and Other Viruses from Wastewater
Source: PubMed Central journal article supplement (PMC9430619; doi:10.1128/spectrum.01102-22), 2022-08-11
Supplement: spectrum.01102-22-s0001.pdf [file spectrum.01102-22-s0001.pdf]

Supplementary material

for

Comparative assessment of filtration- and precipitation-based methods for the concentration of SARS-CoV-2 and other viruses in wastewater

Kata Farkas<sup>a,b,\*</sup>, Cameron Pellett<sup>a</sup>, Natasha Alex-Sanders<sup>a</sup>, Matthew T.P. Bridgman<sup>a</sup>, Alexander Corbishley<sup>c</sup>, Jasmine M.S. Grimsley<sup>d</sup>, Barbara Kasprzyk-Hordern<sup>e</sup>, Jessica L. Kevill<sup>a</sup>, Igor Pântea<sup>a</sup>, India S. Richardson-O'Neill<sup>a</sup>, Kathryn Lambert-Slosarska<sup>a</sup>, Nick Woodhall<sup>a</sup>, Davey L. Jones<sup>a,f</sup>

<sup>a</sup>Centre for Environmental Biotechnology, School of Natural Sciences, Bangor University, Bangor, Gwynedd, LL57 2UW, UK

<sup>b</sup>School of Ocean Sciences, Bangor University, Menai Bridge, Anglesey, LL59 5AB, UK

<sup>c</sup>Royal (Dick) School of Veterinary Studies and The Roslin Institute, University of Edinburgh, Easter Bush Campus, Roslin, EH25 9RG, UK

<sup>d</sup>UK Health Security Agency, Environmental Monitoring for Health Protection, Windsor House, Victoria Street, London SW1H 0TL, UK

<sup>e</sup>Department of Chemistry, University of Bath, Bath, BA2 7AY, UK

<sup>f</sup>Food Futures Institute, Murdoch University, 90 South Street, Murdoch, WA 6105, Australia

Table S1. qPCR standards primers, probes and conditions.

| Assay type                 | Target virus  | Target region (reference)                                                                                                 | qPCR standards                                                                  | Oligo type      | Sequence and concentration/reaction                   | pmol in reaction mix | Reaction conditions                                                                                            |
|----------------------------|---------------|---------------------------------------------------------------------------------------------------------------------------|---------------------------------------------------------------------------------|-----------------|-------------------------------------------------------|----------------------|----------------------------------------------------------------------------------------------------------------|
| Duplex probe-based RT-qPCR | SARS-CoV-2    | N1 gene fragment (2019-Novel Coronavirus (2019-nCoV) Real-time rRT-PCR Panel Primers and Probes, 2020)                    | In-house ssRNA standard (quantified using Qubit 2.0, Invitrogen, USA)           | Forward primers | GACCCCAAATCAGCGAAAT                                   | 10                   | Reverse transcription: 50°C, 30 min.<br>RT inactivation: 95°C, 20 s<br>45 cycles of: 95°C, 3 s and 60°C, 30 s. |
|                            |               |                                                                                                                           |                                                                                 | Reverse primers | TCTGGTACTGCCAGTTGAATCTG                               | 20                   |                                                                                                                |
|                            |               |                                                                                                                           |                                                                                 | Probe           | <b>FAM-ACCCCGCATTACGTTTGGTGGACC-MGB</b>               | 2.5                  |                                                                                                                |
|                            | Phi 6 phage   | <i>phi-6S_1</i> gene, coding P8 protein (Gendron et al., 2010)                                                            | In-house ssRNA standard (quantified using Qubit 2.0, Invitrogen, USA)           | Forward primers | TGGCGGCGGTCAAGAGC                                     | 10                   |                                                                                                                |
|                            |               |                                                                                                                           |                                                                                 | Reverse primers | GGATGATTCTCCAGAAGCTGCTG                               | 20                   |                                                                                                                |
|                            |               |                                                                                                                           |                                                                                 | Probe           | <b>VIC-CGGTCGTGCGAGGTCTGACACTCGC-QSY</b>              | 2.5                  |                                                                                                                |
| Duplex probe-based RT-qPCR | Influenza A   | Matrix protein gene (CDC, 2021)                                                                                           | Synthetic influenza H1N1 (2009) RNA control (Twist Bioscience, USA)             | Forward primers | CAAGACCAATCYGTACCTCTGAC<br>CAAGACCAATCYGTACCTYTGAC    | 10                   |                                                                                                                |
|                            |               |                                                                                                                           |                                                                                 | Reverse primers | GCATTYGGACAAVCGTCTACG<br>GCATTTGGATAAAGCGTCTACG       | 20                   |                                                                                                                |
|                            |               |                                                                                                                           |                                                                                 | Probe           | <b>FAM-TGCAGTCT/ZEN/CGTCACTGGGCACG-IABkFQ</b>         | 5                    |                                                                                                                |
|                            | Influenza B   | Non-structural protein gene (CDC, 2021)                                                                                   | Synthetic influenza B RNA control (Twist Bioscience, USA)                       | Forward primer  | TCCTCAAYTCACTTTCGAGCG                                 | 10                   |                                                                                                                |
|                            |               |                                                                                                                           |                                                                                 | Reverse primer  | CGGTGCTCTTGACCAAATTGG                                 | 20                   |                                                                                                                |
|                            |               |                                                                                                                           |                                                                                 | Probe           | <b>YakYeI-CCAATTGGA/ZEN/GCAGCTGAAACTGCGGTG-IABkFQ</b> | 5                    |                                                                                                                |
| Duplex probe-based RT-qPCR | Norovirus GII | RdRp-ORF1 (ISO/TS 15216-2:2019-Microbiology of food and animal feed — Horizontal method for determination of hepatitis A) | Plasmid DNA (quantified using Qubit 2.0, Invitrogen, USA) (Farkas et al., 2017) | Forward primer  | ATGTTCAAGRTGGATGAGRTTCTCWGA                           | 10                   |                                                                                                                |
|                            |               |                                                                                                                           |                                                                                 | Reverse primer  | TCGACGCCATCTTCATTCACA                                 | 20                   |                                                                                                                |
|                            |               |                                                                                                                           |                                                                                 | Probe           | <b>FAM-AGCACGTGGGAGGGCGATCG-MGB</b>                   | 5                    |                                                                                                                |

|                                |                   |                                                                                                             |                                                                                       |                |                                                                     |  |    |
|--------------------------------|-------------------|-------------------------------------------------------------------------------------------------------------|---------------------------------------------------------------------------------------|----------------|---------------------------------------------------------------------|--|----|
|                                |                   | <i>virus and norovirus in food using real-time RT-PCR — Part 2: Method for qualitative detection, 2019)</i> |                                                                                       |                |                                                                     |  |    |
|                                | Murine norovirus  | ORF1–ORF2 junction region (Kitajima et al., 2010)                                                           | Plasmid DNA (quantified using Qubit 2.0, Invitrogen, USA)                             | Forward primer | CCGCAGGAACGCTCAGCAG                                                 |  | 10 |
|                                |                   |                                                                                                             |                                                                                       | Reverse primer | GGYTGAATGGGGACGGCCTG                                                |  | 20 |
|                                |                   |                                                                                                             |                                                                                       | Probe          | <b>DO-ATGAGTGTGGCGCA-DDQ</b>                                        |  | 5  |
|                                |                   |                                                                                                             |                                                                                       |                |                                                                     |  |    |
| Duplex probe-based RT-qPCR     | Enteroviruses     | VP1 region (Public Health Wales)                                                                            | Synthetic Enterovirus D68 RNA control (Twist Bioscience, USA)                         | Forward primer | GGTYGAAGAGYCTATTGAGC                                                |  | 10 |
|                                |                   |                                                                                                             |                                                                                       | Reverse primer | GCTCCGYIGTTRGGATTAGCCG                                              |  | 20 |
|                                |                   |                                                                                                             |                                                                                       | Probe          | <b>HEX-TCCTCCGGCCCTG-BHQ</b>                                        |  | 5  |
|                                | Enterovirus D68   | 5' NTR region (Poelman et al., 2015)                                                                        | Synthetic Enterovirus D68 RNA control (Twist Bioscience, USA)                         | Forward primer | TGTTCCACGGTTGAAAACAA                                                |  | 10 |
|                                |                   |                                                                                                             |                                                                                       | Reverse primer | TGTCTAGCGTCTCATGGTTTTAC                                             |  | 20 |
|                                |                   |                                                                                                             |                                                                                       | Probes         | <b>FAM-TCCGCTATAGTACTTCG-MGB</b><br><b>FAM-ACCCTATAGTACTTCG-MGB</b> |  | 5  |
| Singleplex probe-based RT-qPCR | Measles virus     | Nucleoprotein gene (Hummel et al., 2006)                                                                    | RNA extracted from vaccine (quantified against commercial standard (Primerdesign, UK) | Forward primer | TGGCATCTGAACTCGGTATCA                                               |  | 10 |
|                                |                   |                                                                                                             |                                                                                       | Reverse primer | TGTCCTCAGTAGTATGCATTGCAA                                            |  | 20 |
|                                |                   |                                                                                                             |                                                                                       | Probe          | <b>FAM-CCGAGGATGCAAGGCTTGTTCAGA-QSY</b>                             |  | 5  |
| Singleplex probe-based RT-qPCR | Human rotavirus A | Commercial assay, Primerdesign, UK                                                                          | Commercial assay, Primerdesign, UK                                                    | Forward primer | Not available                                                       |  |    |
|                                |                   |                                                                                                             |                                                                                       | Reverse primer | Not available                                                       |  |    |
|                                |                   |                                                                                                             |                                                                                       | Probe          | Not available                                                       |  |    |

|                                |                          |                                                             |                                                           |                |                                          |     |                                                                                                                                                                                                                              |
|--------------------------------|--------------------------|-------------------------------------------------------------|-----------------------------------------------------------|----------------|------------------------------------------|-----|------------------------------------------------------------------------------------------------------------------------------------------------------------------------------------------------------------------------------|
| Singleplex probe-based RT-qPCR | Pepper mild mottle virus | Replication-associated protein gene (Haramoto et al., 2013) | Commercial ssDNA of the target sequence                   | Forward primer | GAGTGGTTTGACCTAACGTTTGA                  | 10  |                                                                                                                                                                                                                              |
|                                |                          |                                                             |                                                           | Reverse primer | TTGTCGGTTGCAATGCAAGT                     | 20  |                                                                                                                                                                                                                              |
|                                |                          |                                                             |                                                           | Probe          | <b>FAM-CCTACCGAAGCAAATG-MGB</b>          | 5   |                                                                                                                                                                                                                              |
| Singleplex probe-based qPCR    | CrAssphage               | Putative DNA-binding protein (Stachler et al., 2017)        | Plasmid DNA (quantified using Qubit 2.0, Invitrogen, USA) | Forward primer | CAGAAGTACAACTCCTAAAAACGTAGAG             | 5   | Denaturation: 95°C, 5 min.<br>40 cycles of: 95°C, 15 s and 60°C, 1 min.                                                                                                                                                      |
|                                |                          |                                                             |                                                           | Reverse primer | GATGACCAATAACAAGCCATTAGC                 | 10  |                                                                                                                                                                                                                              |
|                                |                          |                                                             |                                                           | Probe          | <b>FAM-AATAACGATTTACGTGATGTAAC-TAMRA</b> | 2.5 |                                                                                                                                                                                                                              |
| Singleplex SYBR Green qPCR     | Adenovirus               | Hexon gene (van Maarseveen et al., 2010)                    | Plasmid DNA (quantified using Qubit 2.0, Invitrogen, USA) | Forward primer | CATGACTTTTGAGGTGGATC                     | 10  | Denaturation: 95°C, 5 min<br>40 cycles of: 95°C, 15 s and 55°C, 1 min.<br>Melting curve analysis: 95 °C, 15 s; annealing 60°C, 1 min.<br>Dissociation: 60 °C to 95 °C (0.05 °C/s).<br>Melting peak (Tm) at 86.2 °C ± 0.3 °C. |
|                                |                          |                                                             |                                                           | Reverse primer | CCGGCCGAGAAGGGTGTGCGCAGGTA               | 10  |                                                                                                                                                                                                                              |

Table S2. Limit of detection (LOD), limit of quantification (LOQ) values determined as genome copies (gc) per  $\mu\text{l}$  RNA/DNA extract, slope,  $R^2$  and efficiency of the (RT-)qPCR assays. LOD and LOQ was determined as described in Farkas et al. (2017). N/A: not available.

| Target virus             | LOD (gc/ $\mu\text{l}$ ) | LOQ (gc/ $\mu\text{l}$ ) | Slope           | $R^2$       | Efficiency (%)  |
|--------------------------|--------------------------|--------------------------|-----------------|-------------|-----------------|
| SARS-CoV-2 (N1)          | 0.917                    | 12.597                   | -3.563 - -3.243 | 0.971-0.999 | 91.55-103.39    |
| Phi 6 phage              | N/A                      | N/A                      | -3.579 - -3.164 | 0.969-0.999 | 90.27-107.03    |
| Influenza A              | 1.825                    | 7.12                     | -3.569 - -3.304 | 0.991-0.999 | 90.63-100.75    |
| Influenza B              | 1.18                     | 4.6                      | -3.550 - -3.361 | 0.995-0.999 | 91.28-98.38     |
| Norovirus GI             | N/A                      | N/A                      | -3.212 - -3.252 | 0.988-0.995 | 103.00 - 104.82 |
| Norovirus GII            | 1.6                      | 9.2                      | -3.51 - -3.554  | 0.994-0.996 | 91.14-92.69     |
| Murine norovirus         | N/A                      | N/A                      | -3.473          | 0.973       | 94.07           |
| Measles virus            | N/A                      | N/A                      | -3.107 - -3.196 | 0.979-0.994 | 105.52-109.83   |
| Human rotavirus A        | N/A                      | N/A                      | -3.251 - -3.547 | 0.995-0.998 | 91.38-103.03    |
| Pepper mild mottle virus | N/A                      | N/A                      | -3.381          | 0.997       | 97.60           |
| CrAssphage               | 2.305                    | 12.895                   | -3.449 - -3.125 | 0.973-0.998 | 94.95-108.91    |
| Adenovirus               | N/A                      | N/A                      | -3.360 - -3.362 | 0.995-0.996 | 98.37-98.45     |

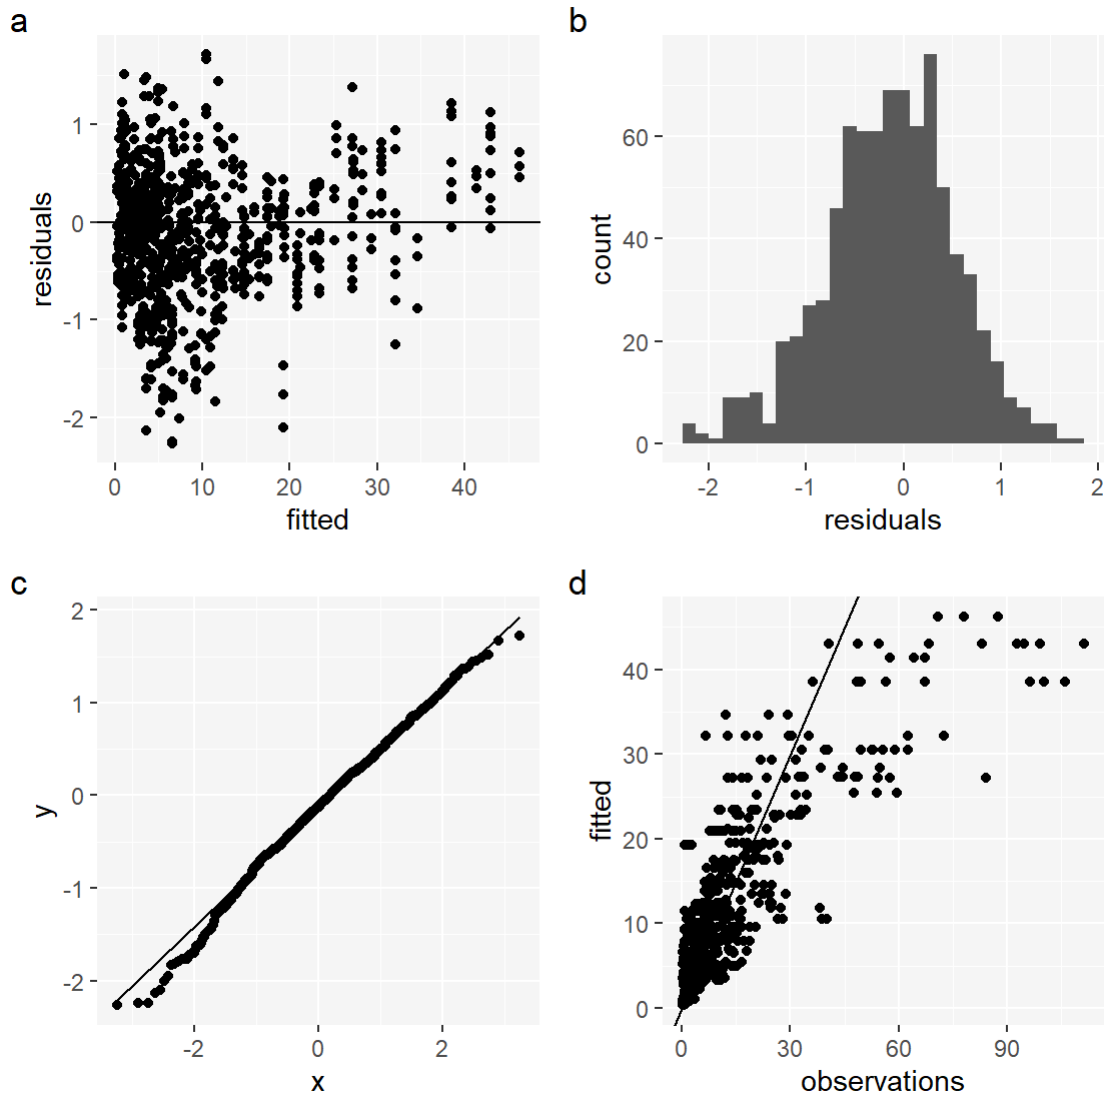

Figure S1: Residual plot of the generalised linear model fitted as a Gamma distribution with a logarithmic link function. Residual plots of (a) homoscedasticity, (b) histogram normality, (c) quantile-quantile normality, and (d) true observations against fitted values.

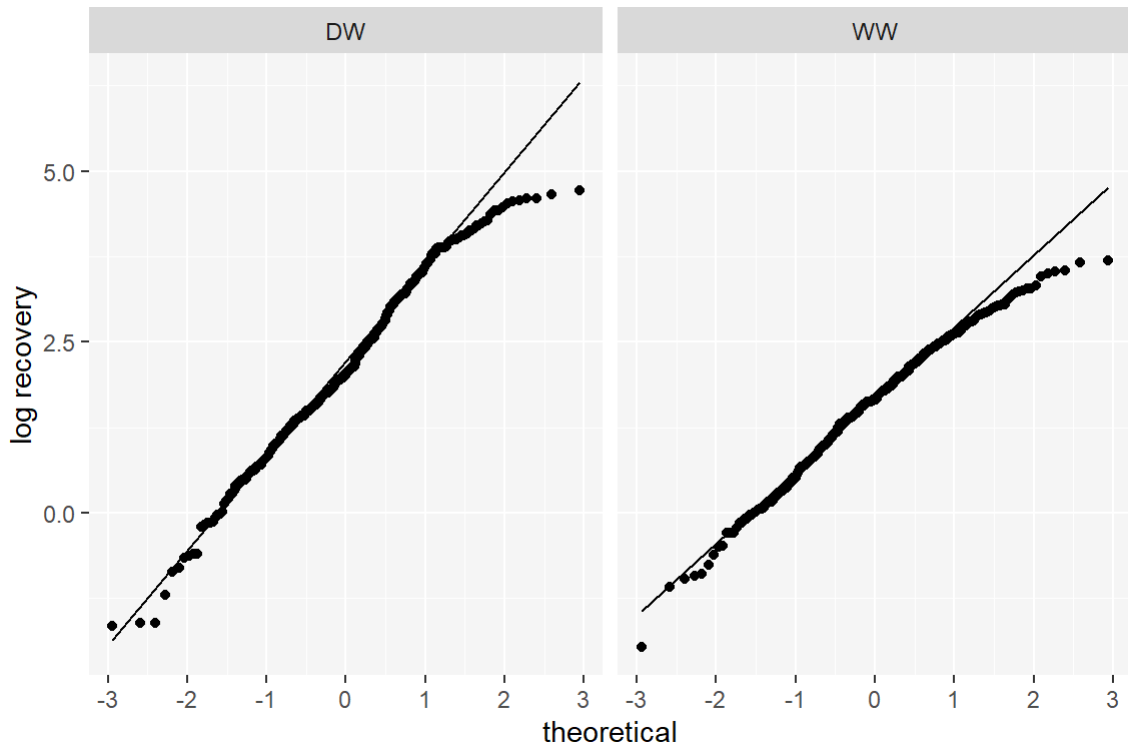

Figure S2: Quantile-quantile plot of  $\log_{10}$  transformed virus recovery grouped by water type (Deionised water DW and wastewater WW).

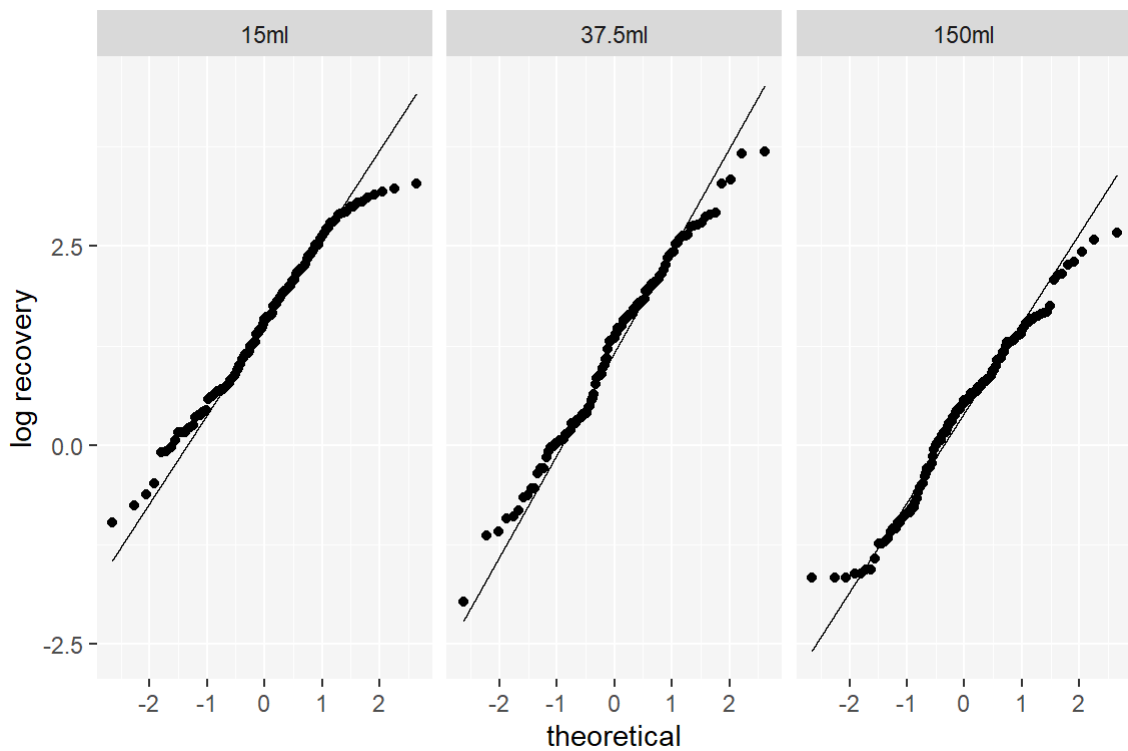

Figure S3: Quantile-quantile plot of  $\log_{10}$  transformed virus recovery grouped starting volume of wastewater.

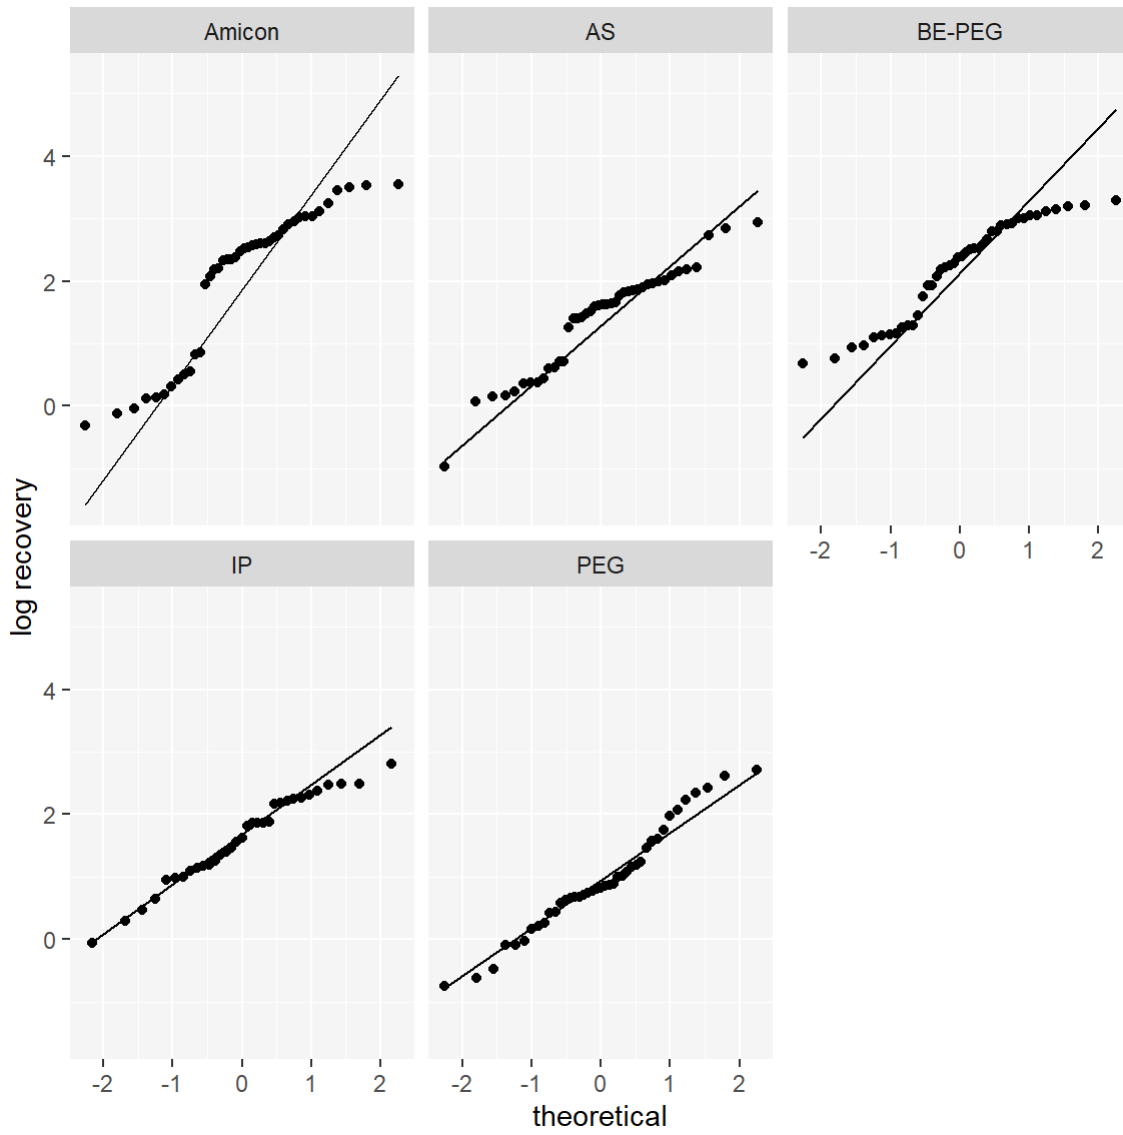

Figure S4: Quantile-quantile plot of  $\log_{10}$  transformed virus recovery grouped by concentration method.



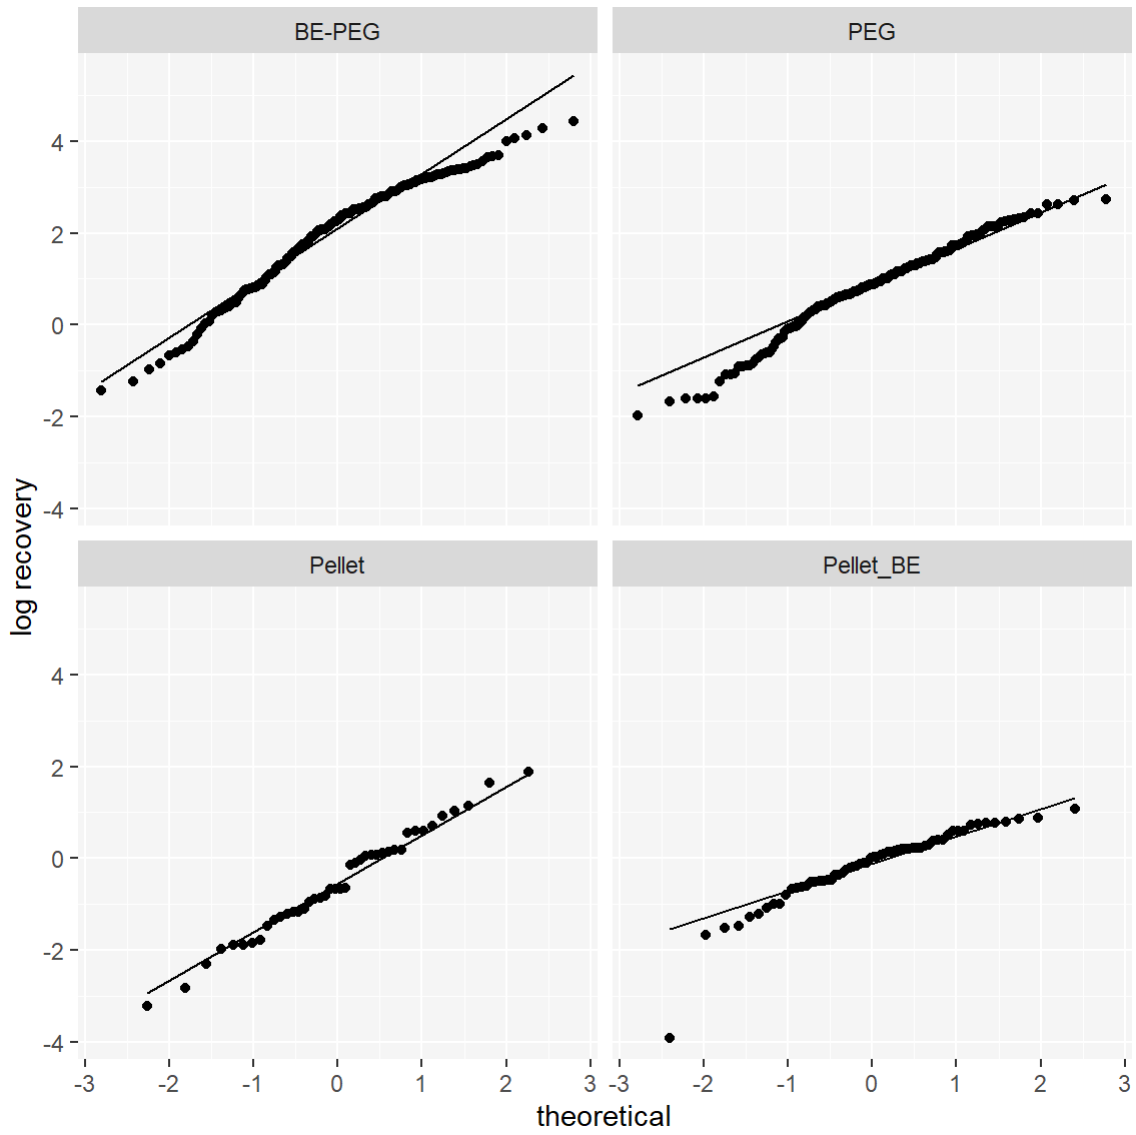

Figure S5: Quantile-quantile plot of log<sub>10</sub> transformed virus recovery grouped by pellet and concentrated sample.

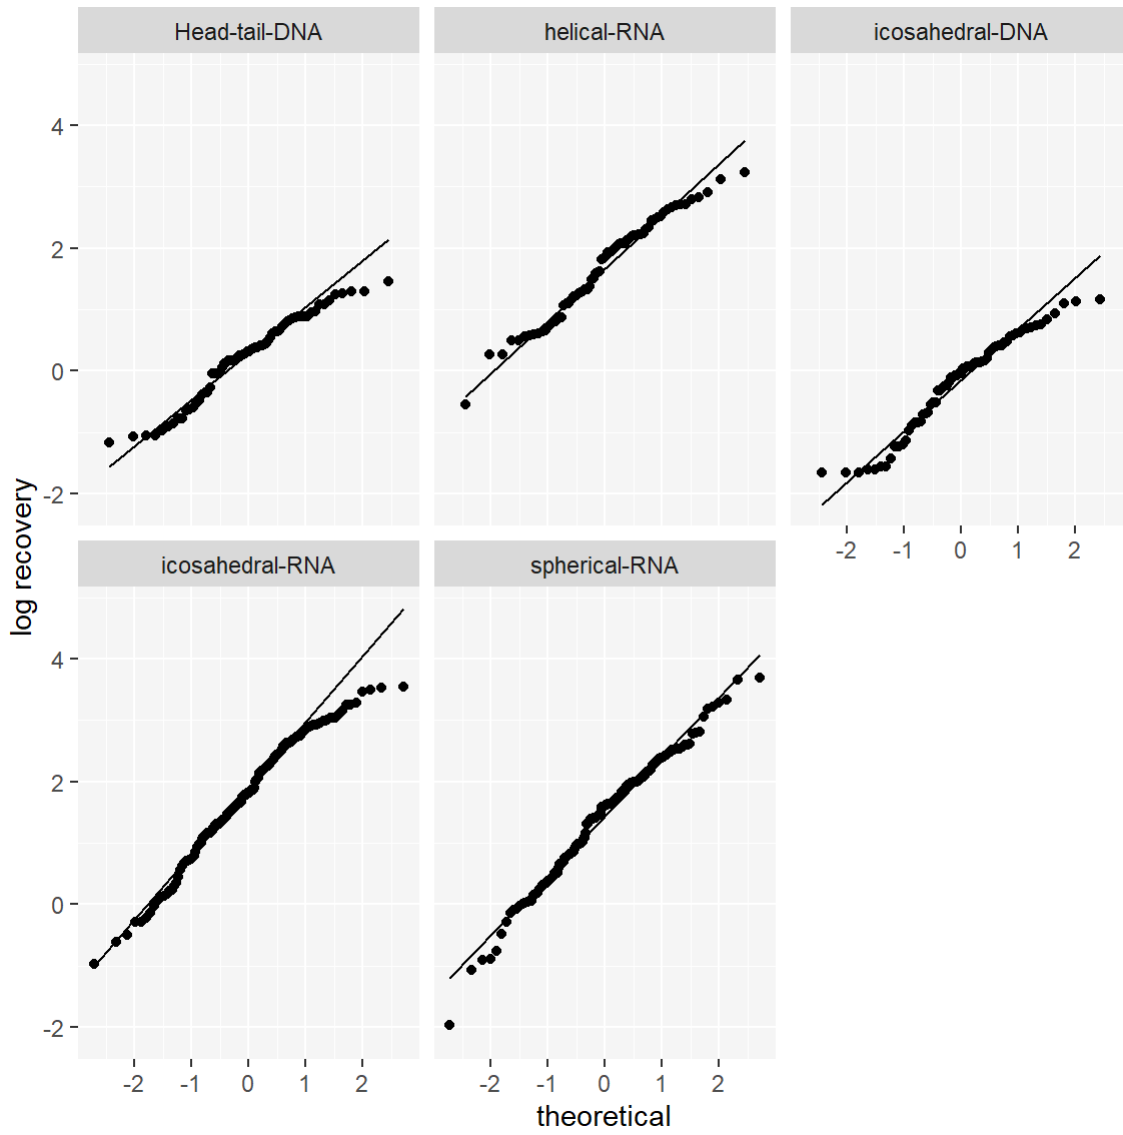

Figure S6: Quantile-quantile plot of  $\log_{10}$  transformed virus recovery grouped by virus shape and genome type.

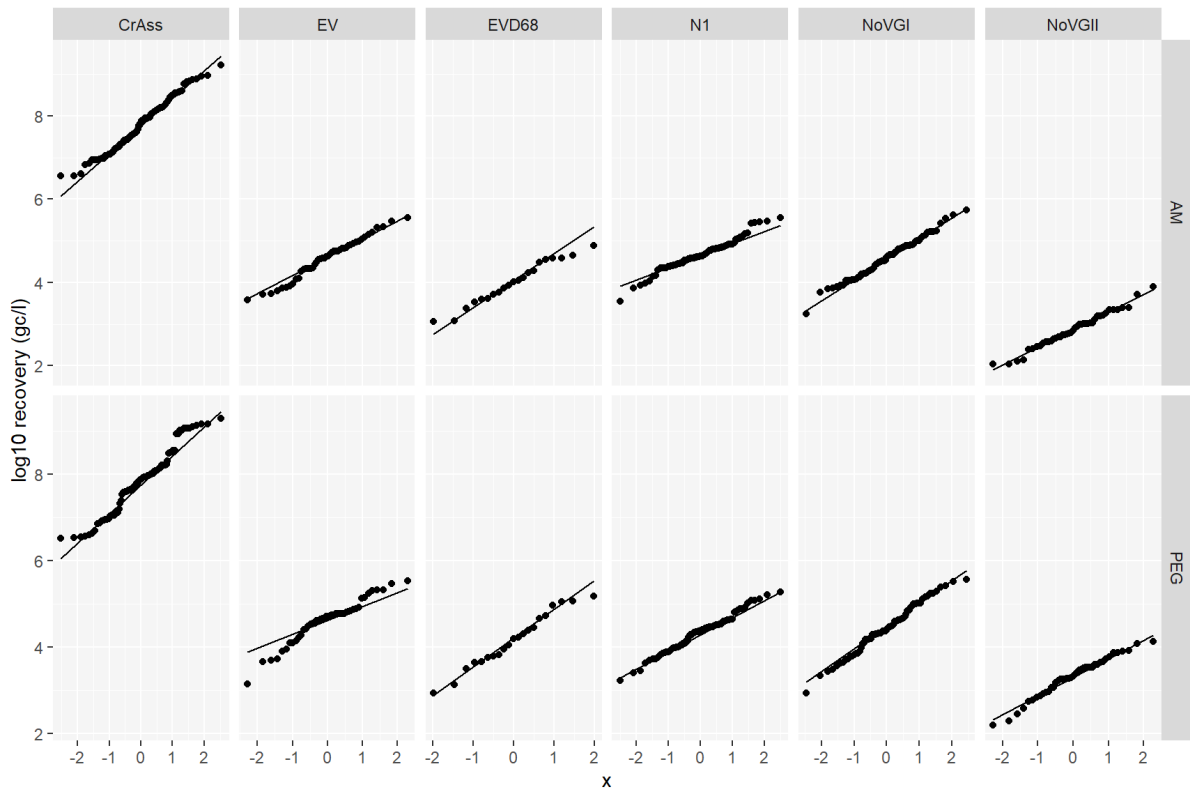

Figure S7. Quantile-quantile normality of the  $\log_{10}$  transformed recovery of each virus with each concentration method.

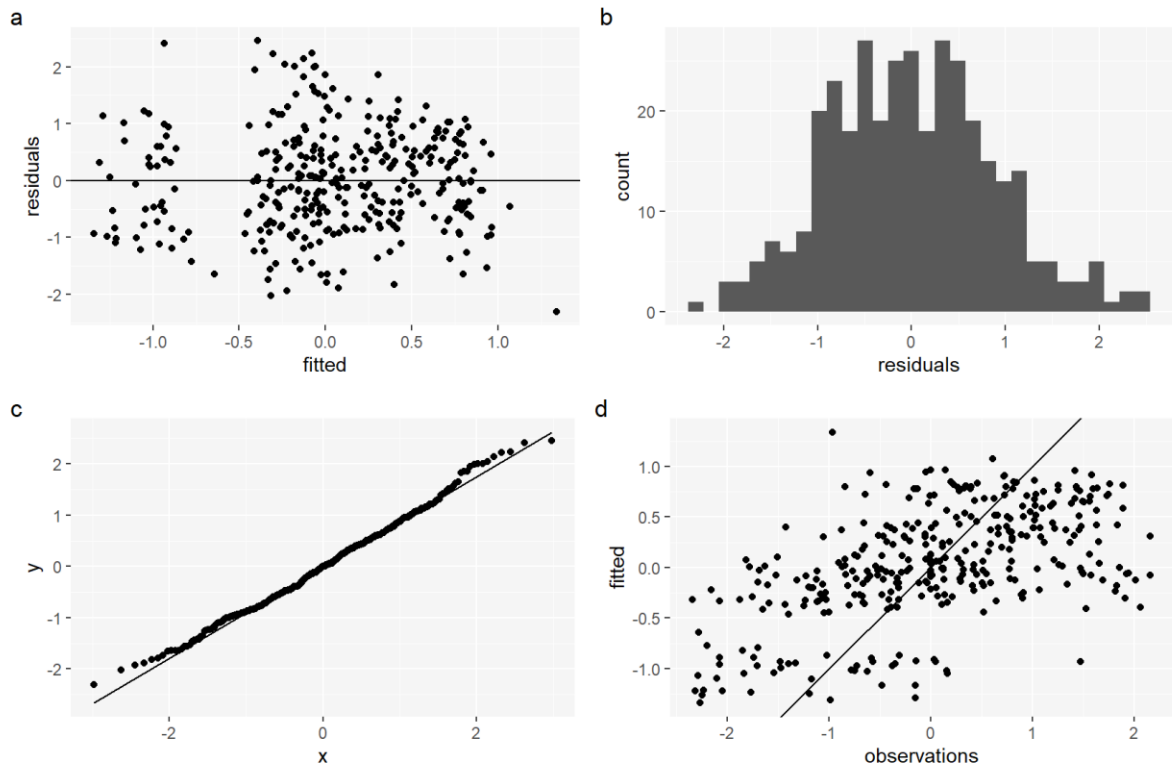

Figure S8. Residual plot of the linear mixed effects model. Residual plots of (a) homoscedasticity, (b) histogram normality, (c) quantile-quantile normality with  $x$  as a theoretical normal distribution, and (d) true observations against fitted values.

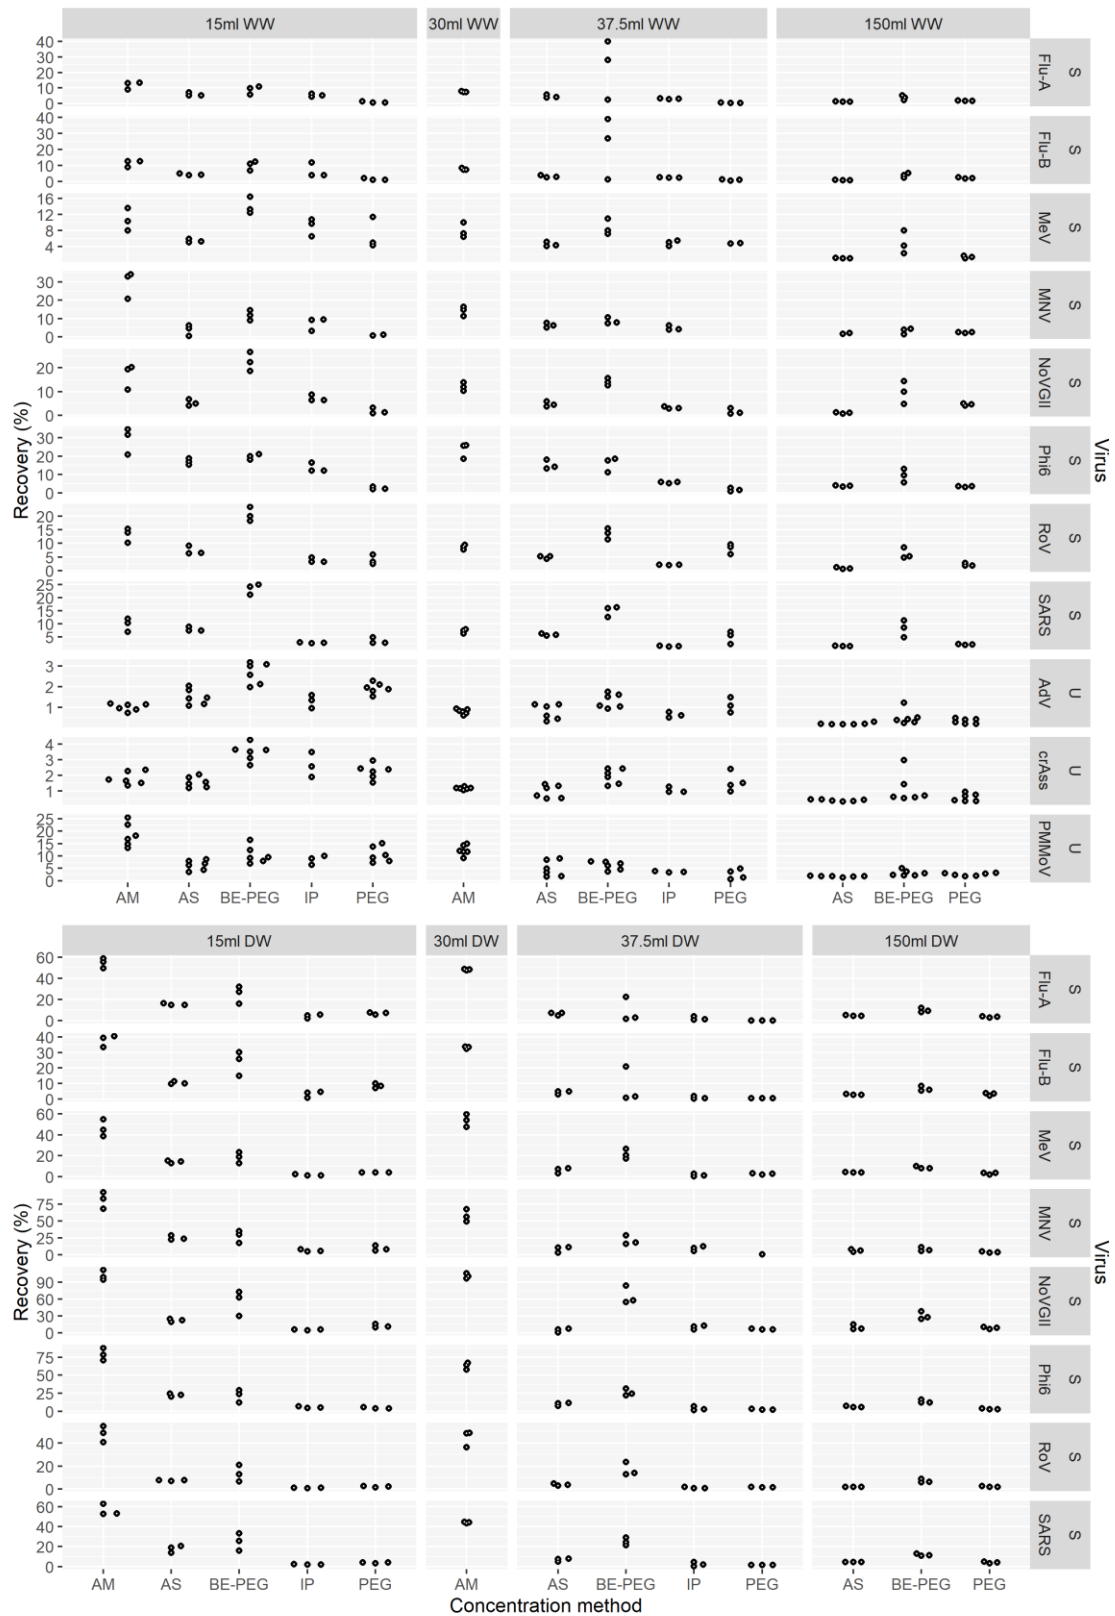

Figure S9. Recovery percentage for all 11 spiked (S) and unspiked (U) viruses grouped by wastewater (WW), deionised water (DW), sample volume (ml), and concentration method. Points have been offset on the horizontal axis to avoid over plotting.

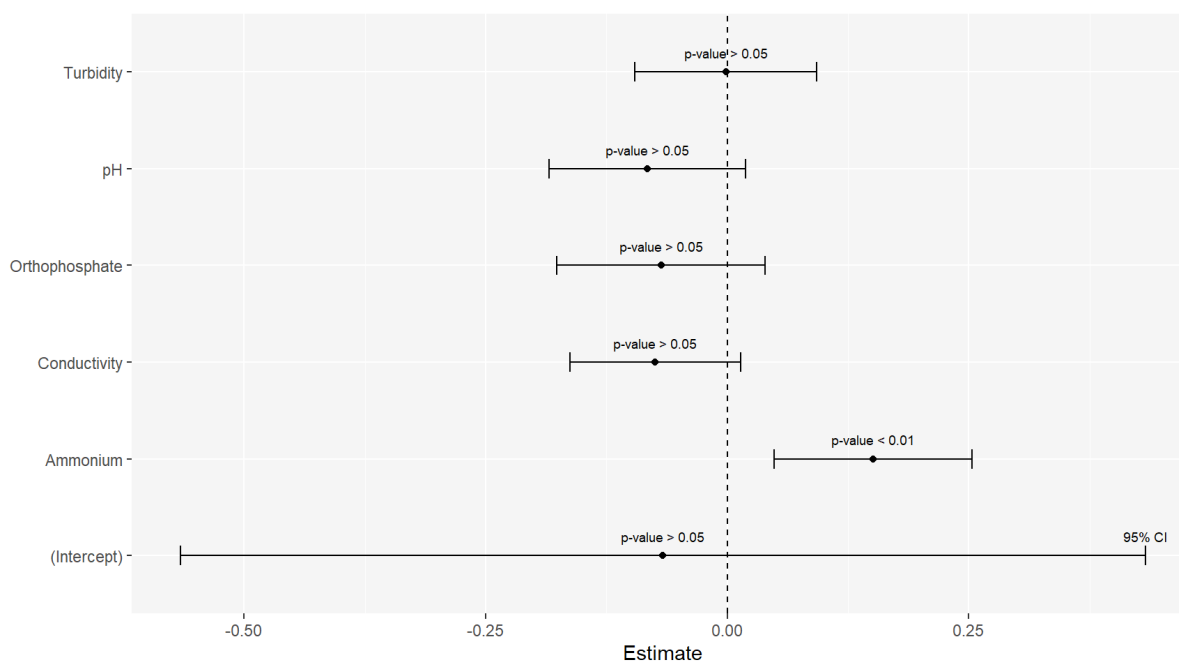

Figure S10: Linear mixed model assessing the effect of chemistry on the proportion of Amicon BE-PEG gene copies per litre recovery (Amicon recovery divided by BE-PEG recovery). The assessed proportion was power transformed using the Box-Cox method, selecting the lambda that maximised the  $\log_{10}$ -Likelihood (lambda = -0.02). The target virus was included as random effects to account for the variability between viruses, borrowing strength to assess the effect of chemistry. Estimates less than zero suggest the Amicon method performs worse than the BE-PEG method when predictor variables increase, or on average with regards to the intercept. Estimates are labelled with their p-values and the line ranges around the estimate indicate the 95% confidence intervals (CI).

## References

- 2019-Novel Coronavirus (2019-nCoV) Real-time rRT-PCR Panel Primers and Probes, 2020. . Centers for Disease Control and Prevention, Atlanta, Georgia.
- Farkas, K., Malham, S.K., Peters, D.E., de Rougemont, A., McDonald, J.E., de Rougemont, A., Malham, S.K., Jones, D.L., 2017. Evaluation of two triplex one-step qRT-PCR assays for the quantification of human enteric viruses in environmental samples. *Food Environ. Virol.* 9, 343–349. <https://doi.org/10.1007/s12560-017-9293-5>
- Gendron, L., Verreault, D., Veillette, M., Moineau, S., Duchaine, C., 2010. Evaluation of filters for the sampling and quantification of RNA phage aerosols. *Aerosol Sci. Technol.* 44, 893–901. <https://doi.org/10.1080/02786826.2010.501351>
- Haramoto, E., Kitajima, M., Kishida, N., Konno, Y., Katayama, H., Asami, M., Akiba, M., 2013. Occurrence of pepper mild mottle virus in drinking water sources in Japan. *Appl. Environ. Microbiol.* 79, 7413–7418. <https://doi.org/10.1128/AEM.02354-13>
- Hummel, K.B., Lowe, L., Bellini, W.J., Rota, P.A., 2006. Development of quantitative gene-specific real-time RT-PCR assays for the detection of measles virus in clinical specimens. *J. Virol. Methods* 132, 166–173. <https://doi.org/https://doi.org/10.1016/j.jviromet.2005.10.006>

- ISO/TS 15216-2:2019-Microbiology of food and animal feed — Horizontal method for determination of hepatitis A virus and norovirus in food using real-time RT-PCR — Part 2: Method for qualitative detection, 2019. . International Organization for Standardization, Geneva Switzerland.
- Kitajima, M., Oka, T., Takagi, H., Tohya, Y., Katayama, H., Takeda, N., Katayama, K., 2010. Development and application of a broadly reactive real-time reverse transcription-PCR assay for detection of murine noroviruses. *J. Virol. Methods* 169, 269–273. <https://doi.org/10.1016/j.jviromet.2010.07.018>
- Poelman, R., Schölvinc, E.H., Borger, R., Niesters, H.G.M., van Leer-Buter, C., 2015. The emergence of enterovirus D68 in a Dutch University Medical Center and the necessity for routinely screening for respiratory viruses. *J. Clin. Virol.* 62, 1–5. <https://doi.org/10.1016/j.jcv.2014.11.011>
- Stachler, E., Kelty, C., Sivaganesan, M., Li, X., Bibby, K., Shanks, O.C., 2017. Quantitative crAssphage PCR assays for human fecal pollution measurement. *Environ. Sci. Technol.* 51, 9146–9154. <https://doi.org/10.1021/acs.est.7b02703>
- van Maarseveen, N.M., Wessels, E., de Brouwer, C.S., Vossen, A.C.T.M., Claas, E.C.J., 2010. Diagnosis of viral gastroenteritis by simultaneous detection of Adenovirus group F, Astrovirus, Rotavirus group A, Norovirus genogroups I and II, and Sapovirus in two internally controlled multiplex real-time PCR assays. *J. Clin. Virol.* 49, 205–210. <https://doi.org/10.1016/j.jcv.2010.07.019>
